1 **The Burden of Antimicrobial Resistance among Urinary Tract Isolates of *Escherichia coli* in the United**  
2 **States in 2017**

3 Ian A Critchley<sup>a#</sup>, Nicole Cotroneo<sup>a</sup>, Michael J Pucci<sup>a</sup>, Rodrigo Mendes<sup>b</sup>

4

5 <sup>a</sup>Spero Therapeutics, Cambridge, MA, USA

6 <sup>b</sup>JMI Laboratories, North Liberty, IA, USA

7

8 Running Head: Resistance, Urinary tract infections, *Escherichia coli*, oral antibiotics

9

10 #Correspondence:

11 Ian A Critchley

12 Spero Therapeutics

13 675 Massachusetts Avenue

14 14<sup>th</sup> Floor

15 Cambridge, MA 02139

16 E-mail: [icritchley@sperotherapeutics.com](mailto:icritchley@sperotherapeutics.com)

17

18

19

20

21

22

23

24

25

26

27

28

29

30 **Abstract:**

31 Urinary tract infections (UTIs) caused by *Escherichia coli* have been historically managed with oral  
32 antibiotics including the cephalosporins, fluoroquinolones and trimethoprim-sulfamethoxazole. The use  
33 of these agents is being compromised by the increase in extended spectrum  $\beta$ -lactamase (ESBL)-  
34 producing organisms, mostly caused by the emergence and clonal expansion of *E. coli* multilocus  
35 sequence typing (ST) 131. In addition, ESBL isolates show co-resistance to many of oral agents.  
36 Management of UTIs caused by ESBL and fluoroquinolone-resistant organisms is becoming increasingly  
37 challenging to treat outside of the hospital setting with clinicians having to resort to intravenous agents.  
38 The aim of this study was to assess the prevalence of ESBL phenotypes and genotypes among UTI  
39 isolates of *E. coli* collected in the US during 2017 as well as the impact of co-resistance to oral agents  
40 such as the fluoroquinolones and trimethoprim-sulfamethoxazole. The national prevalence of ESBL  
41 phenotypes of *E. coli* was 15.7% and was geographically distributed across all nine Census regions.  
42 Levofloxacin and trimethoprim-sulfamethoxazole-resistance rates were  $\geq 24\%$  among all isolates and  
43 this co-resistance phenotype was considerably higher among isolates showing an ESBL phenotype ( $\geq$   
44 59.2%) and carrying *bla*<sub>CTX-M-15</sub> ( $\geq 69.5\%$ ). The agents with the highest potency against UTI isolates of *E.*  
45 *coli*, including ESBL isolates showing cross-resistance across oral agents, were the intravenous  
46 carbapenems. The results of this study indicate that new oral options with the spectrum and potency  
47 similar to the intravenous carbapenems would address a significant unmet need for the treatment of  
48 UTIs in an era of emergence and clonal expansion of ESBL isolates resistant to several classes of  
49 antimicrobial agents, including oral options.

50

51

52

53

54

55

56

57

58

59

60 **Introduction:**

61 Urinary tract infections (UTIs) caused by pathogens such as *Escherichia coli*, the most prevalent UTI  
62 pathogen, have been historically managed with oral antibiotics including the cephalosporins,  
63 trimethoprim-sulfamethoxazole (TMP-SMX) and the fluoroquinolones. Unfortunately, in recent years we  
64 have seen the utility of many of these agents being eroded because of widespread use and the  
65 subsequent development of resistance [1]. When ciprofloxacin was first introduced in the mid-1980s  
66 resistance among UTI isolates of *E. coli* was nonexistent (<1%)[2]. Fluoroquinolone-resistant *E. coli* has  
67 progressively increased in the United States from 1.2% in 1998 [2] to 25% in 2012-2014 [3].  
68 Furthermore, resistance to trimethoprim-sulfamethoxazole among UTI isolates of *E. coli* has also  
69 increased from 7 to 9% [4] in 1989 to 1992 to 30% in 2009 to 2013 [5].

70 The increasing prevalence of the extended spectrum  $\beta$ -lactamases (ESBLs) among Gram-negative  
71 organisms also seriously compromises the activity of the cephalosporins such as ceftriaxone that is  
72 recommended for treatment of pyelonephritis [6] and many of the oral agents used to treat UTIs such as  
73 cefuroxime [7]. ESBL-producing *E. coli* pose additional risk factors including longer duration of hospital  
74 stay [8]. Of particular concern are the high levels of antimicrobial co-resistance among ESBL-producing  
75 organisms that includes many of the oral agents used to treat UTIs [9, 10]. A particular driver of the  
76 rapid rise of ESBL-based resistance is the expansion of the ST131-H30 clone of *E. coli* that is well  
77 established as a globally disseminated multidrug resistant clone [11, 12]. The ST131 clone is frequently  
78 associated with the CTX-M-15 ESBL which is now the most prevalent ESBL in the US and many other  
79 countries [13, 14]. In addition, ST131-H30 isolates are uniformly fluoroquinolone-resistant due to  
80 conserved replacement mutations in *gyrA* and *parC* [15] which are responsible for the millions  
81 fluoroquinolone and cephalosporin-resistant infections being reported globally [16]. Moreover, this  
82 clone has also been associated with a higher rate of persistent UTI, adverse outcomes and empiric  
83 antimicrobial therapy failure [17, 18].

84 Surveillance studies with isolates collected from 2009 to 2011 have shown that the only agents that  
85 remain highly active against ESBL-producing *E. coli* and other common uropathogens are the  
86 intravenous carbapenems because of their inherent stability to  $\beta$ -lactamases other than carbapenemase  
87 enzymes [19]. The goal for this study was to assess the prevalence of ESBL phenotypes and genotypes  
88 among UTI isolates of *E. coli* collected in the USA in 2017, and the impact of co-resistance to widely used  
89 oral agents such as the fluoroquinolones and trimethoprim-sulfamethoxazole. The study also evaluated

90 the activity of the intravenous carbapenems to determine if they remain highly active against ESBL-  
91 producing and fluoroquinolone-resistant organisms.

92

93

94

95

96

97

98

99

100

101

102

103

104

105

106

107

108

109

110

111

112

113

114

115

116

117

118

## 119 **Materials and Methods**

### 120 **Bacterial isolates**

121 A total of 1831 isolates of *E. coli* were collected from 30 participating medical centers that were  
122 geographically distributed among the 9 USA Census divisions in 2017 as part of the SENTRY surveillance  
123 platform (JMI Laboratories, North Liberty, IA, USA). The isolates evaluated in this study were collected  
124 from patients with urinary tract infections according to defined protocols [20]. Only isolates determined  
125 to be significant by local criteria as the reported probable cause of infection were included in the study.  
126 Species identification was confirmed using standard biochemical tests and using a MALDI Biotyper  
127 (Bruker Daltronics, Billerica, MA) according to the manufacturer's instructions.

### 128 **Susceptibility testing**

129 All isolates were centrally tested (JMI Laboratories, North Liberty, IA) using the broth microdilution  
130 method in accordance with CLSI guidelines. In particular, the antibiotics evaluated in the study included  
131 various oral antibiotics routinely used to treat UTIs including the cephalosporins, fluoroquinolones and  
132 trimethoprim-sulfamethoxazole, as well as the intravenous carbapenems and other agents used to treat  
133 UTIs. ESBL phenotypes were determined in accordance with CLSI MIC screening criteria, as previously  
134 described [21]. CLSI susceptibility interpretive criteria for the Enterobacteriaceae were used to  
135 determine susceptibility and resistance rates for all agents where appropriate, including for determining  
136 the fluoroquinolone- and trimethoprim-sulfamethoxazole-resistant subsets (CLSI M100-S28).

### 137 **Resistant subsets and $\beta$ -lactamase screening**

138 All isolates that met ESBL MIC screening criteria were further analyzed using molecular methods (Next-  
139 Generation Sequencing; NGS) to identify specific  $\beta$ -lactamase genes such as *bla*<sub>CTX-M-15</sub>. For NGS, DNA  
140 extracts were quantified using the Qubit High Sensitivity DS-DNA assay (Invitrogen/Thermo Fisher, Inc)  
141 and normalized to 0.2 ng/ $\mu$ L. A total of 1 ng of high-quality genomic DNA was used as input material for  
142 library construction using the Nextera XT DNA library preparation kit (Illumina, San Diego, CA). Libraries  
143 were normalized using the bead-based normalization procedure (Illumina) and sequenced on MiSeq.  
144 Fastq files generated were assembled using SPAdes Assembler and subjected to proprietary software  
145 (JMI Laboratories) for screening of  $\beta$ -lactamase genes.

### 146 **Data analyses**

147 All data and analysis reported in this study were conducted using the publicly available Microbiology  
148 Visualization Platform ([www.sentry-mvp.jmilabs/app/sentry-public](http://www.sentry-mvp.jmilabs/app/sentry-public)). This freely available online tool

149 provides query and analysis capability of the SENTRY Antimicrobial Surveillance Program database and it  
150 was used for this study to generate national and regional resistance rates and analyze co-resistance for  
151 the ESBL phenotypes as well as the susceptibility results for the *bla*<sub>CTX-M-15</sub> genotypes of *E. coli*.

152

153

154

155

156

157

158

159

160

161

162

163

164

165

166

167

168

169

170

171

172

## 173 **Results**

### 174 **Susceptibility of all UTI isolates of *E. coli* collected in the USA during 2017**

175 The results in **Table 1** show the susceptibility results for different antimicrobial agents against the 1831  
176 isolates of *E. coli* collected from UTI patients. Resistance to levofloxacin and ciprofloxacin were observed  
177 in 24.3% and 25.8% of isolates, respectively. A TMP-SMX resistance phenotype was noted in 32.1% of  
178 isolates. Using the oral breakpoints for cefuroxime, 36.8% of isolates were non-susceptible. In contrast,  
179 the intravenous carbapenems including doripenem, ertapenem, imipenem and meropenem were all  
180 highly active ( $\geq 99.4\%$  susceptible) with little or no resistance being observed. Among other agents,  
181 amikacin was also one of the most active agents with only 0.3% of the UTI isolates of *E. coli* being non-  
182 susceptible. Ampicillin-sulbactam was among one of the least active agents with 46% of the isolates  
183 being non-susceptible.

### 184 **Prevalence of ESBL phenotypes of *E. coli* and co-resistance to widely used oral antimicrobial agents**

185 **Figure 1** shows the national and regional prevalence of ESBL phenotypes, levofloxacin-resistant and  
186 TMP-SMX-resistant isolates of *E. coli* from UTIs in the USA in 2017. There were 287 (15.7%) out of the  
187 1831 isolates of *E. coli* identified as ESBL phenotypes. ESBL phenotypes were identified among isolates  
188 from all US Census regions and ranged from 10.5% in West North Central region to 29.6% in the mid-  
189 Atlantic region. The national prevalence of levofloxacin-resistant among *E. coli* from UTIs was 24.3% and  
190 ranged from 18% in the Mountain region to 38.1% in the mid-Atlantic region. The national prevalence of  
191 TMP-SMX-resistant *E. coli* was 32.1% and ranged from 26.8% in East North Central to 43.5% in the mid-  
192 Atlantic. The mid-Atlantic region exhibited the highest burden of resistance among UTI *E. coli* among all  
193 the Census regions.

194 ESBL phenotypes were further analyzed as a subgroup to evaluate the extent of co-resistance to other  
195 agents including oral agents widely used to treat UTIs. The results in **Figure 2** show the resistance rates  
196 among the 287 ESBL phenotypes of *E. coli* from UTIs in the USA during 2017. Not surprisingly, 93.6% of  
197 the ESBL phenotypes were resistant to cefuroxime. High resistance rates were also observed for  
198 ciprofloxacin and levofloxacin at 71.8% and 67.9%, respectively. There was also high resistance to TMP-  
199 SMX with 56.1% of the ESBL phenotypes being resistant. In contrast, the agents with the lowest  
200 resistance rates were the intravenous carbapenems with none of the isolates being resistant to  
201 doripenem, imipenem and meropenem and only 1.4% of isolates being resistant to ertapenem.

202 **Figure 3** shows the prevalence of levofloxacin, TMP-SMX and meropenem resistance rates among ESBL  
203 isolates of *E. coli* across the 9 Census regions. The national prevalence of levofloxacin-resistance was  
204 67.9% and ranged from 52.6% in East North Central to 82.4% in the East South Central region. Similarly,  
205 the national prevalence of TMP-SMX resistance was 59.2% and ranged from 36.8% in West South  
206 Central to 74.2% in the mid-Atlantic region. No meropenem-resistant UTI isolates of *E. coli* were  
207 identified in any of the Census regions.

#### 208 **Co-resistance among fluoroquinolone-resistant and TMP-SMX-resistant *E. coli***

209 The results in **Table 2** show the resistance profiles of isolates that are either resistant to levofloxacin or  
210 TMP-SMX. Among the levofloxacin-resistant *E. coli* co-resistance was observed for cefuroxime with  
211 45.7% resistance and for TMP-SMX with 56.2% of the isolates being reported as resistant. Similarly, for  
212 the TMP-SMX-resistant isolates of *E. coli* 31.3% were co-resistant to cefuroxime and 42.5% co-resistant  
213 to levofloxacin. In contrast, little or no resistance was observed for the carbapenems against  
214 levofloxacin and/or TMP-SMX-resistant isolates.

#### 215 **Susceptibility of *bla*<sub>CTX-M-15</sub> genotypes of UTI isolates of *E. coli***

216 The *bla*<sub>CTX-M-15</sub> genotypes were identified among 151 of the UTI isolates of *E. coli* collected in the USA  
217 during 2017. The susceptibility results for various antimicrobial agents are shown in **Table 3**. The isolates  
218 were highly resistant to the fluoroquinolones with resistance rates of 81.5% and 83.4%, respectively, for  
219 levofloxacin and ciprofloxacin. High resistance was also observed for TMP-SMX (69.5%) and cefuroxime  
220 (100%). High resistance rates were also observed for many of the other agents tested with the exception  
221 of the carbapenem where none of the isolates were resistant and amikacin where 1.3% of the isolates  
222 were resistant.

223

224

225

226

227

228

229



## 230 Discussion

231 While oral antibiotics have been a mainstay of therapy for treating UTI's the results from this study show  
232 that levofloxacin and/or TMP-SMX resistance rates are  $\geq 24\%$  among UTI isolates of *E. coli* collected in  
233 the US during 2017. This increase in resistance suggests that considerable caution should be exercised  
234 when choosing to use the fluoroquinolones as their widespread use has resulted in being implicated as a  
235 "smoking gun" due to their role in promoting resistance [22]. This increase in fluoroquinolone-resistance  
236 among UTI isolates of *E. coli* is now resulting in calls to combat their use as first choice agents [23]. In  
237 this study fluoroquinolone resistance among UTI isolates of *E. coli* was also geographically distributed  
238 across all nine Census regions. The mid-Atlantic region exhibited the highest prevalence of levofloxacin-  
239 resistant isolates of *E. coli* (38.1%) and is consistent with prevalence data from other studies [5, 14, 24].

240 This study also showed the prevalence of ESBL phenotypes of *E. coli* from UTIs was 15.7% and many of  
241 these isolates exhibited considerable co-resistance to many of the currently available oral agents. The  
242 increase in prevalence of ESBLs is likely due to the widespread use of the cephalosporins [25]. Another  
243 possible factor for the increased prevalence of ESBL phenotypes of *E. coli* is the global dissemination of  
244 the ST131 clone that frequently carries *bla*<sub>CTX-M-15</sub> [26]. In particular, *E. coli* 025b:H4/ST131 is now  
245 prevalent in long term care facilities, exhibits co-resistance to the fluoroquinolones, aminoglycosides  
246 and TMP-SMX, and now represents a considerable public health concern [11, 12]. The factors  
247 responsible for the successful global dissemination of *E. coli* ST131 remain to be elucidated but may be  
248 due to the type I fimbrial adhesins that may allow it to colonize the gastrointestinal tract more  
249 efficiently [27-29].

250 The ESBL phenotypes of *E. coli* reported in this study were geographically distributed across the nine  
251 Census regions with the highest prevalence being among isolates collected in the mid-Atlantic region  
252 and is similar to the high prevalence reported in previous studies [14]. To further evaluate the co-  
253 resistance among ESBL phenotypes, the resistance rates were determined for currently available oral  
254 agents that included the fluoroquinolones and TMP-SMX and the high levels of co-resistance at  $\geq 59\%$   
255 have confirmed that high rates of co-resistance exist for contemporary isolates collected in 2017.  
256 Furthermore, the increased resistance to TMP-SMX is equally concerning since this resistance is plasmid-  
257 mediated with genes that not only encode enzymes such as type II dihydrofolate reductase but also  
258 additional genes that confer resistance to other antibiotic classes including the fluoroquinolones with  
259 the ability to spread between organisms [30].

260 This study not only assessed co-resistance among ESBL phenotypes but also among TMP-SMX and  
261 fluoroquinolone-resistant isolates. Not surprisingly, the TMP-SMX-resistant isolates of *E. coli* exhibited  
262 high co-resistance ( $\geq 30\%$ ) to the fluoroquinolones and cefuroxime. Also, the fluoroquinolone-resistant  
263 isolates of *E. coli* exhibited high co-resistance ( $\geq 45\%$ ) to TMP-SMX and ceforuxime. The high co-  
264 resistance among the currently available oral agents suggests that, if you lose susceptibility to one, you  
265 lose them all.

266 The increase in resistance to many of the currently available oral options makes the management of  
267 UTIs caused by coresistant ESBL-producing organisms a significant challenge for the clinician to treat  
268 outside of the hospital setting. Although the results of this study show that the intravenous  
269 carbapenems remain very active against most UTI isolates of *E. coli* with little or no carabapenem  
270 resistance, no oral options with the spectrum and potency of the carbapenems are currently available.  
271 While the development of new and systemic agents have been directed to the treatment of  
272 carbapenem-resistant Enterobacteriaceae UTIs, little or no effort has been dedicated to the  
273 development of new oral options for the treatment of UTIs caused by ESBL-producing and  
274 fluoroquinolone-resistant organisms. The development of new oral options present additional  
275 challenges, since they must be stable in solid form, and possess the appropriate pharmacodynamic  
276 properties once adequately dissolved and adsorbed in the GI tract, these agents need to reach the site  
277 of infection. Oral agents with the spectrum and potency of the intravenous carbapenems would address  
278 a substantial unmet need for new options to treat multi-drug-resistant UTI pathogens. In particular, the  
279 carbapenems are inherently stable to the ESBL and Class C (AmpC)  $\beta$ -lactamases, present in organisms  
280 that are prevalent among common Gram-negative UTI pathogens [31].

281 **Table 1: Susceptibility results for 1831 isolates of *E. coli* from urinary tract infections collected in the**  
 282 **USA in 2017 (SENTRY Antimicrobial Surveillance Program)**

| Agent                         | MIC ( $\mu\text{g/mL}$ ) |              |             | %S <sup>a</sup> | %I <sup>a</sup> | %R <sup>a</sup>   |
|-------------------------------|--------------------------|--------------|-------------|-----------------|-----------------|-------------------|
|                               | Range                    | 50%          | 90%         |                 |                 |                   |
| Levofloxacin                  | $\leq 0.03$ - $>16$      | $\leq 0.03$  | 16          | 74.2            | 1.5             | 24.3              |
| Ciprofloxacin                 | $\leq 0.03$ - $>4$       | $\leq 0.03$  | $>4$        | 73.9            | 0.3             | 25.8              |
| Trimethoprim-sulfamethoxazole | $\leq 0.5$ - $>8$        | $\leq 0.5$   | $>8$        | 67.9            | -               | 32.1              |
| Cefuroxime                    | $\leq 0.12$ - $>64$      | 4            | $>64$       | 63.2            | 20.9            | 15.9 <sup>b</sup> |
|                               |                          |              |             | 80.3            | 3.8             | 15.9 <sup>c</sup> |
| Amoxicillin-clavulanate       | 0.5 - $>32$              | 8            | 16          | 77.9            | 16.4            | 5.8               |
| Ampicillin-sulbactam          | $\leq 0.5$ - $>64$       | 8            | 64          | 54.1            | 17.3            | 28.7              |
| Piperacillin-tazobactam       | $\leq 0.06$ - $>128$     | 2            | 4           | 97.8            | 1.3             | 0.9               |
| Doripenem                     | $\leq 0.06$ - 1          | $\leq 0.06$  | $\leq 0.06$ | 100             | 0.0             | 0.0               |
| Ertapenem                     | $\leq 0.008$ - 2         | $\leq 0.008$ | 0.03        | 99.4            | 0.3             | 0.2               |
| Imipenem                      | $\leq 0.12$ - 1          | $\leq 0.12$  | 0.25        | 100             | 0.0             | 0.0               |
| Meropenem                     | $\leq 0.015$ - 1         | $\leq 0.015$ | 0.03        | 100             | 0.0             | 0.0               |
| Cefepime                      | $\leq 0.12$ - $>16$      | $\leq 0.12$  | 8           | 88.6            | 2.6             | 8.8 <sup>d</sup>  |
| Ceftazidime                   | 0.03 - $>32$             | 0.25         | 8           | 89.0            | 2.5             | 8.5               |
| Amikacin                      | 1 - $>32$                | 2            | 4           | 99.7            | 0.2             | 0.1               |
| Gentamicin                    | 0.25 - $>16$             | 0.5          | $>16$       | 87.7            | 0.4             | 11.9              |
| Doxycycline                   | 0.25 - $>8$              | 1            | $>8$        | 72.4            | 7.9             | 19.7              |
| Minocycline                   | 0.25 - $>32$             | 1            | 8           | 86.9            | 6.3             | 6.8               |
| Tetracycline                  | 0.5 - $>16$              | 2            | $>16$       | 70.2            | 0.1             | 29.7              |

a. 2018 CLSI Interpretive criteria. %S = percent susceptible, %I = percent intermediate, %R = percent resistant

b. Using oral breakpoints

c. Using parenteral breakpoints

d. Intermediate interpreted as susceptible-dose dependent

283

284

285

286

287

288

289

290

291

292

293 **Table 2: Co-resistance among trimethoprim-sulfamethoxazole-resistant and levofloxacin-resistant *E.***  
294 ***coli* from urinary tract infections collected in the USA in 2017**

| Agent                         | Percent co-resistance among UTI isolates of <i>E. coli</i> resistant to: |                           |
|-------------------------------|--------------------------------------------------------------------------|---------------------------|
|                               | Trimethoprim-sulfamethoxazole<br>(N = 588)                               | Levofloxacin<br>(N = 445) |
| Cefuroxime                    | 31.3                                                                     | 45.7                      |
| Ceftazidime                   | 15.0                                                                     | 24.7                      |
| Ciprofloxacin                 | 44.2                                                                     | 100                       |
| Levofloxacin                  | 42.5                                                                     | 100                       |
| Doripenem                     | 0.0                                                                      | 0.0                       |
| Ertapenem                     | 0.3                                                                      | 0.5                       |
| Imipenem                      | 0.0                                                                      | 0.0                       |
| Meropenem                     | 0.0                                                                      | 0.0                       |
| Trimethoprim-sulfamethoxazole | 100                                                                      | 56.2                      |

295  
296  
297  
298  
299  
300  
301  
302  
303  
304  
305  
306  
307  
308  
309  
310  
311

312 **Table 3: Activity of antimicrobial agents against confirmed CTX-M-15  $\beta$ -lactamase-producing isolates**  
 313 **of *E. coli* collected from UTIs in the USA during 2016**

| Antimicrobial Agent           | MIC ( $\mu\text{g/mL}$ ) |             | %S <sup>a</sup> | %I <sup>a</sup> | %R <sup>a</sup>   |
|-------------------------------|--------------------------|-------------|-----------------|-----------------|-------------------|
|                               | Range                    | 90%         |                 |                 |                   |
| Levofloxacin                  | $\leq 0.03$ - $>16$      | $>16$       | 17.2            | 1.3             | 81.5              |
| Ciprofloxacin                 | $\leq 0.03$ - $>4$       | $>4$        | 15.2            | 1.3             | 83.4              |
| Trimethoprim-sulfamethoxazole | $\leq 0.5$ - $>8$        | $>8$        | 30.5            | -               | 69.5              |
| Cefuroxime                    | $>64$                    | $>64$       | 0.0             | 0.0             | 100 <sup>b</sup>  |
|                               |                          |             | 0.0             | 0.0             | 100 <sup>c</sup>  |
| Amoxicillin-clavulanate       | 4 - 32                   | 32          | 34.8            | 52.2            | 13.0              |
| Ampicillin-sulbactam          | 4 - $>64$                | 64          | 8.6             | 19.9            | 71.5              |
| Piperacillin-tazobactam       | 0.25 - $>128$            | 32          | 89.4            | 6.6             | 4.0               |
| Doripenem                     | $\leq 0.06$ - 0.5        | $\leq 0.06$ | 100             | 0.0             | 0.0               |
| Ertapenem                     | $\leq 0.008$ - 1         | 0.25        | 97.1            | 2.9             | 0.0               |
| Imipenem                      | $\leq 0.12$ - 0.5        | $\leq 0.12$ | 100             | 0.0             | 0.0               |
| Meropenem                     | $\leq 0.015$ - 0.5       | 0.06        | 100             | 0.0             | 0.0               |
| Cefepime                      | 1 - $>16$                | $>16$       | 9.3             | 9.9             | 80.8 <sup>d</sup> |
| Ceftazidime                   | 1 - $>32$                | $>32$       | 14.6            | 13.2            | 72.2              |
| Amikacin                      | 1 - $>32$                | 8           | 96.7            | 2.0             | 1.3               |
| Gentamicin                    | 0.5 - $>16$              | $>16$       | 57.0            | 0.0             | 43.0              |
| Doxycycline                   | 0.5 - $>8$               | $>8$        | 37.1            | 18.6            | 44.3              |
| Minocycline                   | 0.5 - $>32$              | 16          | 74.3            | 8.6             | 17.1              |
| Tetracycline                  | 1 - $>16$                | $>16$       | 32.9            | 0.0             | 67.1              |

a. 2018 CLSI Interpretive criteria; %S = percent susceptible, %I = percent intermediate, %R = percent resistant  
 b. Using oral breakpoints  
 c. Using parenteral breakpoints  
 d. Intermediate interpreted as susceptible-dose dependent

314  
 315  
 316  
 317  
 318  
 319  
 320  
 321  
 322  
 323  
 324

Figure 1: National and regional prevalence of ESBL phenotypes, levofloxacin- and trimethoprim-sulfamethoxazole-resistance phenotypes among 1831 isolates of *E. coli* from UTIs in the USA in 2017

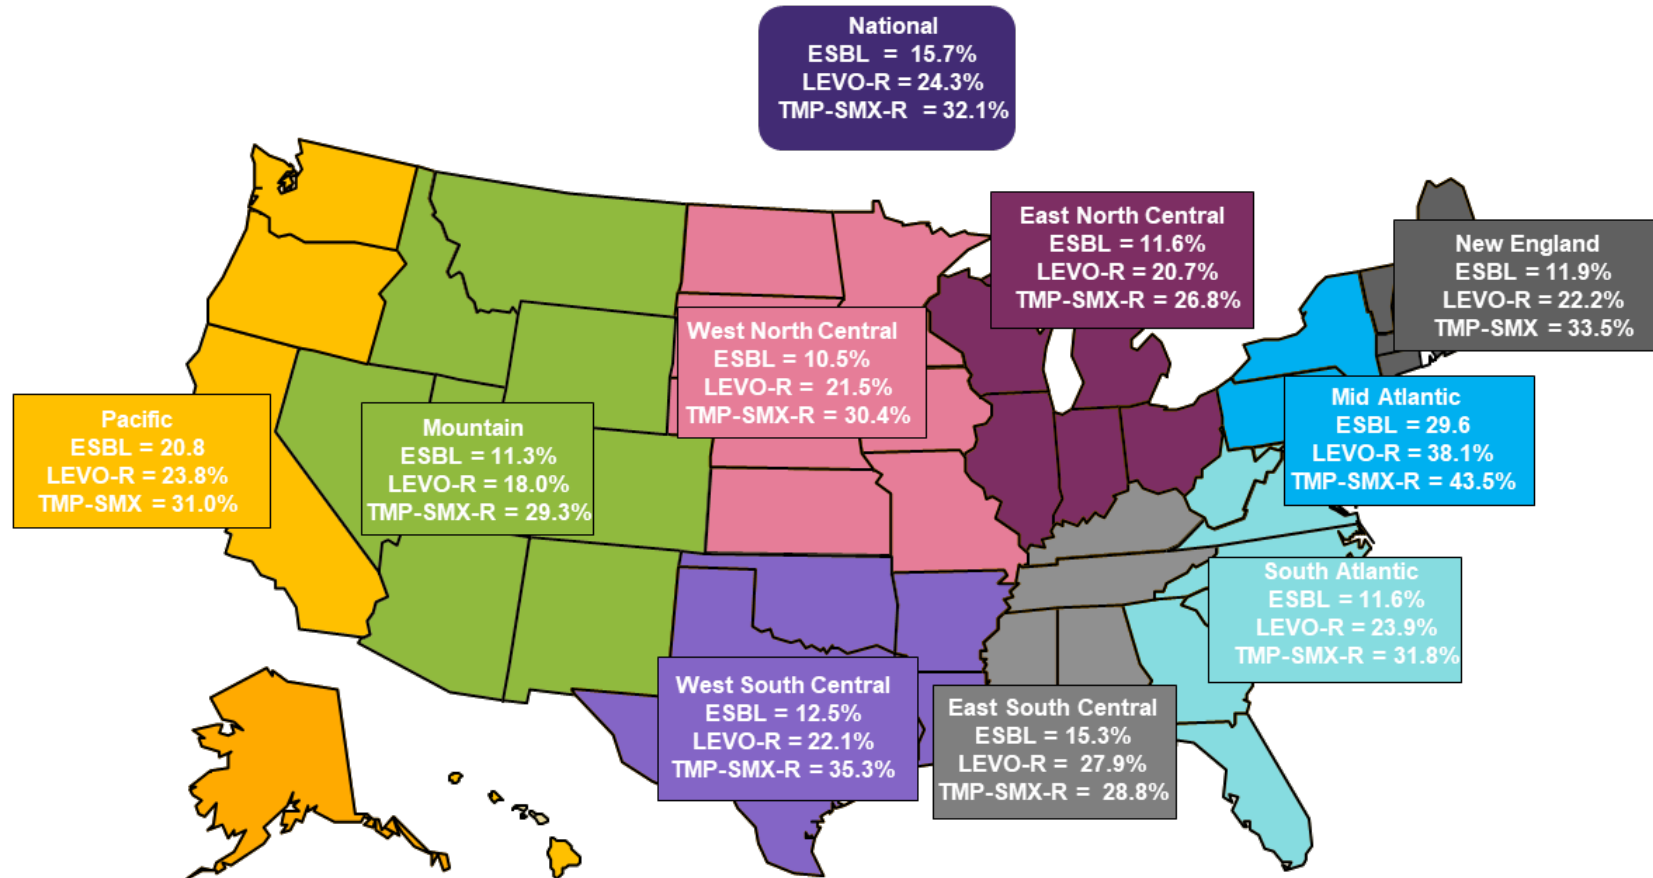

ESBL = extended spectrum  $\beta$ -lactamase, LEVO-R = levofloxacin-resistant, TMP-SMX-R = trimethoprim-sulfamethoxazole-resistant

**Figure 2: Antibiotic resistance among 287 ESBL phenotypes UTI isolates of *E. coli* collected in the US in 2017.**

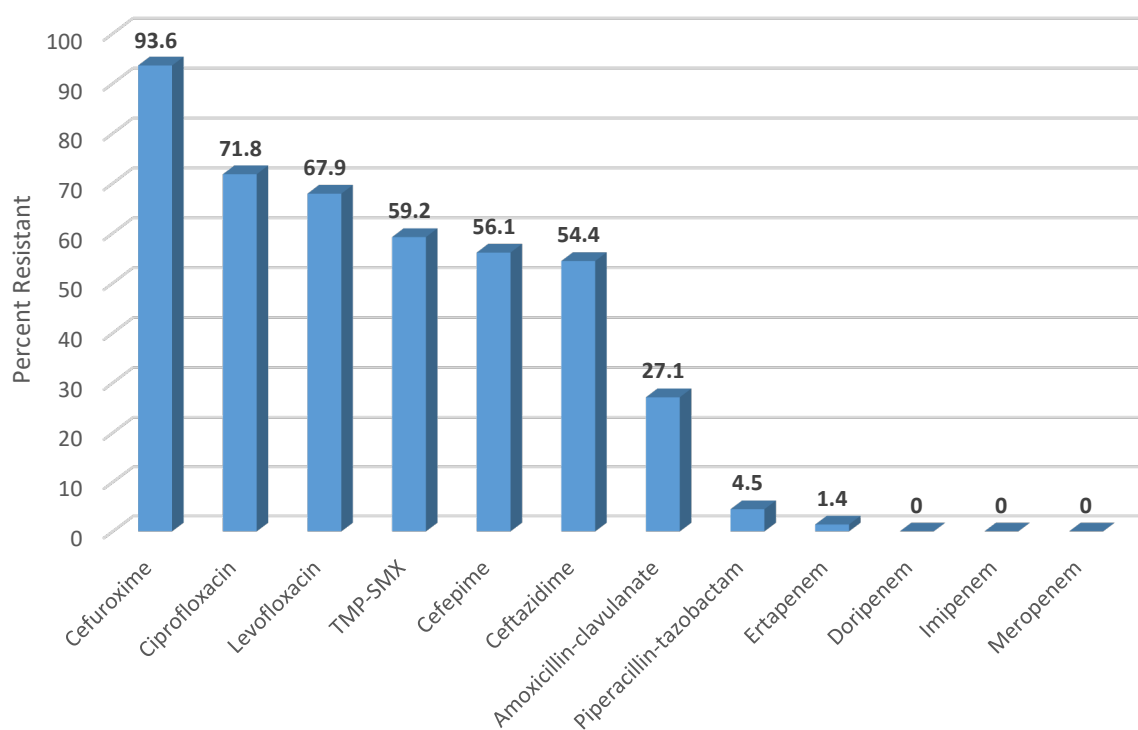

**Figure 3: Resistance to meropenem, levofloxacin and trimethoprim-sulfamethoxazole among 287 ESBL phenotypes of *E. coli* from UTIs in the USA in 2017 according to Census region**

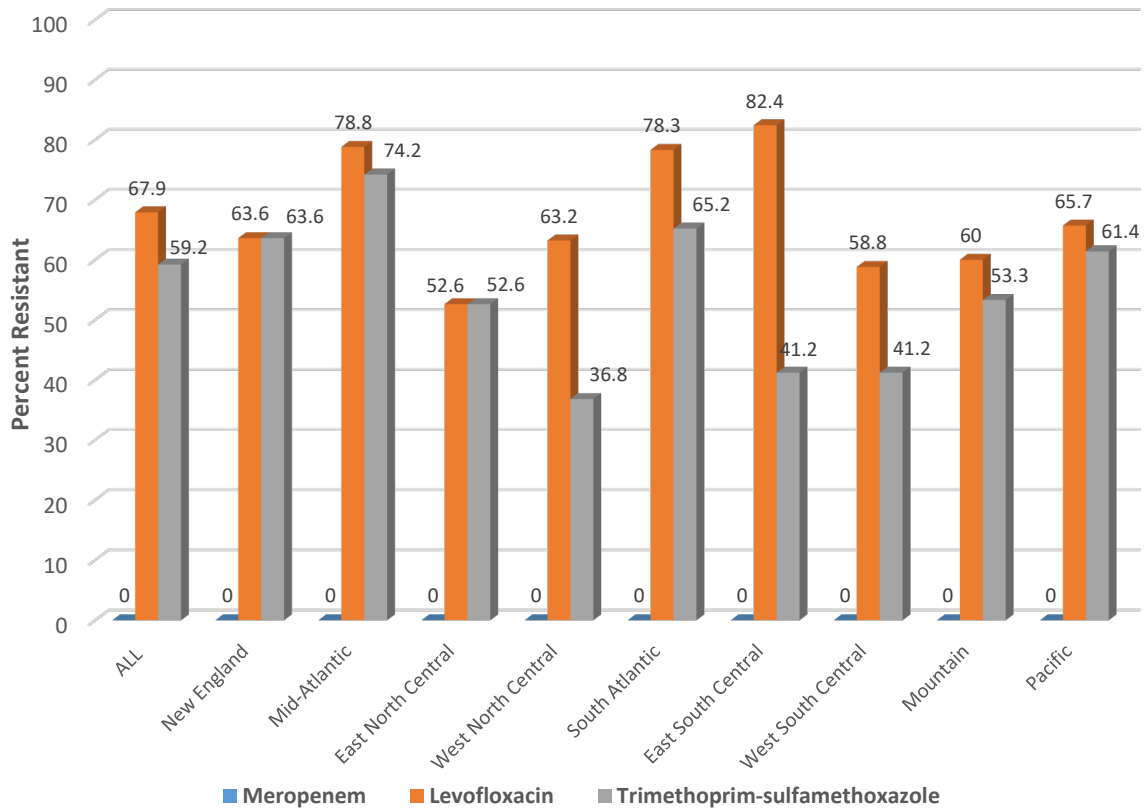



## References

1. Mazzariol A, Bazaj A, Cornaglia G. Multi-drug-resistant Gram-negative bacteria causing urinary tract infections: a review. *J Chemother*. 2017;29(sup1):2-9. Epub 2017/12/23. doi: 10.1080/1120009X.2017.1380395. PubMed PMID: 29271736.
2. Karlowsky JA, Kelly LJ, Thornsberry C, Jones ME, Sahm DF. Trends in antimicrobial resistance among urinary tract infection isolates of *Escherichia coli* from female outpatients in the United States. *Antimicrob Agents Chemother*. 2002;46(8):2540-5. Epub 2002/07/18. doi: 10.1128/aac.46.8.2540-2545.2002. PubMed PMID: 12121930; PubMed Central PMCID: PMC127340.
3. Sader HS, Castanheira M, Flamm RK, Jones RN. Antimicrobial Activities of Ceftazidime-Avibactam and Comparator Agents against Gram-Negative Organisms Isolated from Patients with Urinary Tract Infections in U.S. Medical Centers, 2012 to 2014. *Antimicrob Agents Chemother*. 2016;60(7):4355-60. Epub 2016/04/27. doi: 10.1128/AAC.00405-16. PubMed PMID: 27114273; PubMed Central PMCID: PMC4914695.
4. Gupta K, Scholes D, Stamm WE. Increasing prevalence of antimicrobial resistance among uropathogens causing acute uncomplicated cystitis in women. *JAMA*. 1999;281(8):736-8. Epub 1999/03/03. PubMed PMID: 10052444.
5. Morrill HJ, Morton JB, Caffrey AR, Jiang L, Dosa D, Mermel LA, et al. Antimicrobial Resistance of *Escherichia coli* Urinary Isolates in the Veterans Affairs Health Care System. *Antimicrob Agents Chemother*. 2017;61(5). Epub 2017/02/15. doi: 10.1128/AAC.02236-16. PubMed PMID: 28193660; PubMed Central PMCID: PMC5404570.
6. Gupta K, Hooton TM, Naber KG, Wullt B, Colgan R, Miller LG, et al. International clinical practice guidelines for the treatment of acute uncomplicated cystitis and pyelonephritis in women: A 2010 update by the Infectious Diseases Society of America and the European Society for Microbiology and Infectious Diseases. *Clin Infect Dis*. 2011;52(5):e103-20. Epub 2011/02/05. doi: 10.1093/cid/ciq257. PubMed PMID: 21292654.
7. Pitout JD, Laupland KB. Extended-spectrum beta-lactamase-producing Enterobacteriaceae: an emerging public-health concern. *Lancet Infect Dis*. 2008;8(3):159-66. Epub 2008/02/23. doi: 10.1016/S1473-3099(08)70041-0. PubMed PMID: 18291338.
8. Lautenbach E, Patel JB, Bilker WB, Edelstein PH, Fishman NO. Extended-spectrum beta-lactamase-producing *Escherichia coli* and *Klebsiella pneumoniae*: risk factors for infection and

- impact of resistance on outcomes. *Clin Infect Dis*. 2001;32(8):1162-71. Epub 2001/04/03. doi: 10.1086/319757. PubMed PMID: 11283805.
9. Schwaber MJ, Navon-Venezia S, Schwartz D, Carmeli Y. High levels of antimicrobial coresistance among extended-spectrum-beta-lactamase-producing Enterobacteriaceae. *Antimicrob Agents Chemother*. 2005;49(5):2137-9. Epub 2005/04/28. doi: 10.1128/AAC.49.5.2137-2139.2005. PubMed PMID: 15855548; PubMed Central PMCID: PMC1087677.
  10. Morosini MI, Garcia-Castillo M, Coque TM, Valverde A, Novais A, Loza E, et al. Antibiotic coresistance in extended-spectrum-beta-lactamase-producing Enterobacteriaceae and in vitro activity of tigecycline. *Antimicrob Agents Chemother*. 2006;50(8):2695-9. Epub 2006/07/28. doi: 10.1128/AAC.00155-06. PubMed PMID: 16870760; PubMed Central PMCID: PMC1538654.
  11. Can F, Azap OK, Seref C, Ispir P, Arslan H, Ergonul O. Emerging *Escherichia coli* O25b/ST131 clone predicts treatment failure in urinary tract infections. *Clin Infect Dis*. 2015;60(4):523-7. Epub 2014/11/08. doi: 10.1093/cid/ciu864. PubMed PMID: 25378460.
  12. Can F, Kurt-Azap O, Ispir P, Nurtop E, Seref C, Loclar I, et al. The clinical impact of ST131 H30-Rx subclone in urinary tract infections due to multidrug-resistant *Escherichia coli*. *J Glob Antimicrob Resist*. 2016;4:49-52. Epub 2016/07/21. doi: 10.1016/j.jgar.2015.10.006. PubMed PMID: 27436393.
  13. Lewis JS, 2nd, Herrera M, Wickes B, Patterson JE, Jorgensen JH. First report of the emergence of CTX-M-type extended-spectrum beta-lactamases (ESBLs) as the predominant ESBL isolated in a U.S. health care system. *Antimicrob Agents Chemother*. 2007;51(11):4015-21. Epub 2007/08/29. doi: 10.1128/AAC.00576-07. PubMed PMID: 17724160; PubMed Central PMCID: PMC2151438.
  14. Castanheira M, Farrell SE, Krause KM, Jones RN, Sader HS. Contemporary diversity of  $\beta$ -lactamases among Enterobacteriaceae in the nine U.S. census regions and ceftazidime-avibactam activity tested against isolates producing the most prevalent  $\beta$ -lactamase groups. *Antimicrob Agents Chemother*. 2014;58(2):833-8. Epub 2013/11/18. doi: 10.1128/AAC.01896-13. PubMed PMID: 24247134; PubMed Central PMCID: PMC3910895.
  15. Johnson JR, Porter S, Thuras P, Castanheira M. The Pandemic H30 Subclone of Sequence Type 131 (ST131) as the Leading Cause of Multidrug-Resistant *Escherichia coli* Infections in the United States (2011-2012). *Open Forum Infect Dis*. 2017;4(2):ofx089. Epub 2017/06/24. doi: 10.1093/ofid/ofx089. PubMed PMID: 28638846; PubMed Central PMCID: PMC5473367.

16. Pitout JD, DeVinney R. *Escherichia coli* ST131: a multidrug-resistant clone primed for global domination. *F1000Res*. 2017;6. Epub 2017/03/28. doi: 10.12688/f1000research.10609.1. PubMed PMID: 28344773; PubMed Central PMCID: PMC5333602.
17. Johnson JR, Thuras P, Johnston BD, Weissman SJ, Limaye AP, Riddell K, et al. The Pandemic H30 Subclone of *Escherichia coli* Sequence Type 131 Is Associated With Persistent Infections and Adverse Outcomes Independent From Its Multidrug Resistance and Associations With Compromised Hosts. *Clin Infect Dis*. 2016;62(12):1529-36. Epub 2016/03/31. doi: 10.1093/cid/ciw193. PubMed PMID: 27025834; PubMed Central PMCID: PMC4885656.
18. Tchesnokova V, Riddell K, Scholes D, Johnson JR, Sokurenko EV. The Uropathogenic *Escherichia coli* Subclone Sequence Type 131-H30 Is Responsible for Most Antibiotic Prescription Errors at an Urgent Care Clinic. *Clin Infect Dis*. 2019;68(5):781-7. Epub 2018/07/03. doi: 10.1093/cid/ciy523. PubMed PMID: 29961840; PubMed Central PMCID: PMC6376094.
19. Bouchillon SK, Badal RE, Hoban DJ, Hawser SP. Antimicrobial susceptibility of inpatient urinary tract isolates of gram-negative bacilli in the United States: results from the study for monitoring antimicrobial resistance trends (SMART) program: 2009-2011. *Clin Ther*. 2013;35(6):872-7. Epub 2013/04/30. doi: 10.1016/j.clinthera.2013.03.022. PubMed PMID: 23623624.
20. Kaiser RM, Castanheira M, Jones RN, Tenover F, Lynfield R. Trends in *Klebsiella pneumoniae* carbapenemase-positive *K. pneumoniae* in US hospitals: report from the 2007-2009 SENTRY Antimicrobial Surveillance Program. *Diagn Microbiol Infect Dis*. 2013;76(3):356-60. Epub 2013/05/11. doi: 10.1016/j.diagmicrobio.2013.03.032. PubMed PMID: 23659829.
21. Mendes RE, Jones RN, Woosley LN, Cattoir V, Castanheira M. Application of Next-Generation Sequencing for Characterization of Surveillance and Clinical Trial Isolates: Analysis of the Distribution of beta-lactamase Resistance Genes and Lineage Background in the United States. *Open Forum Infect Dis*. 2019;6(Suppl 1):S69-S78. Epub 2019/03/22. doi: 10.1093/ofid/ofz004. PubMed PMID: 30895217; PubMed Central PMCID: PMC6419912.
22. Trautner BW. Fluoroquinolones for urinary tract infection and within-household spread of resistant Enterobacteriaceae: the smoking gun. *Clin Microbiol Infect*. 2018;24(9):929-30. Epub 2018/04/13. doi: 10.1016/j.cmi.2018.03.038. PubMed PMID: 29649605.
23. Stewardson AJ, Vervoort J, Adriaenssens N, Coenen S, Godycki-Cwirko M, Kowalczyk A, et al. Effect of outpatient antibiotics for urinary tract infections on antimicrobial resistance among commensal Enterobacteriaceae: a multinational prospective cohort study. *Clin Microbiol Infect*. 2018;24(9):972-9. Epub 2018/01/15. doi: 10.1016/j.cmi.2017.12.026. PubMed PMID: 29331548.

24. Bidell MR, Palchak M, Mohr J, Lodise TP. Fluoroquinolone and Third-Generation-Cephalosporin Resistance among Hospitalized Patients with Urinary Tract Infections Due to *Escherichia coli*: Do Rates Vary by Hospital Characteristics and Geographic Region? *Antimicrob Agents Chemother.* 2016;60(5):3170-3. Epub 2016/03/02. doi: 10.1128/AAC.02505-15. PubMed PMID: 26926640; PubMed Central PMCID: PMC4862467.
25. Kumar D, Singh AK, Ali MR, Chander Y. Antimicrobial Susceptibility Profile of Extended Spectrum beta-Lactamase (ESBL) Producing *Escherichia coli* from Various Clinical Samples. *Infect Dis (Auckl).* 2014;7:1-8. Epub 2014/05/23. doi: 10.4137/IDRT.S13820. PubMed PMID: 24847178; PubMed Central PMCID: PMC4024053.
26. Petty NK, Ben Zakour NL, Stanton-Cook M, Skippington E, Totsika M, Forde BM, et al. Global dissemination of a multidrug resistant *Escherichia coli* clone. *Proc Natl Acad Sci U S A.* 2014;111(15):5694-9. Epub 2014/04/08. doi: 10.1073/pnas.1322678111. PubMed PMID: 24706808; PubMed Central PMCID: PMC3992628.
27. Vimont S, Boyd A, Bleibtreu A, Bens M, Goujon JM, Garry L, et al. The CTX-M-15-producing *Escherichia coli* clone O25b: H4-ST131 has high intestine colonization and urinary tract infection abilities. *PLoS One.* 2012;7(9):e46547. Epub 2012/10/03. doi: 10.1371/journal.pone.0046547. PubMed PMID: 23029548; PubMed Central PMCID: PMC3460912.
28. Toval F, Kohler CD, Vogel U, Wagenlehner F, Mellmann A, Fruth A, et al. Characterization of *Escherichia coli* isolates from hospital inpatients or outpatients with urinary tract infection. *J Clin Microbiol.* 2014;52(2):407-18. Epub 2014/01/31. doi: 10.1128/JCM.02069-13. PubMed PMID: 24478469; PubMed Central PMCID: PMC3911323.
29. Schwartz DJ, Kalas V, Pinkner JS, Chen SL, Spaulding CN, Dodson KW, et al. Positively selected FimH residues enhance virulence during urinary tract infection by altering FimH conformation. *Proc Natl Acad Sci U S A.* 2013;110(39):15530-7. Epub 2013/09/05. doi: 10.1073/pnas.1315203110. PubMed PMID: 24003161; PubMed Central PMCID: PMC3785778.
30. Huovinen P. Resistance to trimethoprim-sulfamethoxazole. *Clin Infect Dis.* 2001;32(11):1608-14. Epub 2001/05/08. doi: 10.1086/320532. PubMed PMID: 11340533.
31. Rodriguez-Bano J, Gutierrez-Gutierrez B, Machuca I, Pascual A. Treatment of Infections Caused by Extended-Spectrum-Beta-Lactamase-, AmpC-, and Carbapenemase-Producing Enterobacteriaceae. *Clin Microbiol Rev.* 2018;31(2). Epub 2018/02/16. doi: 10.1128/CMR.00079-17. PubMed PMID: 29444952; PubMed Central PMCID: PMC5967687.
